# Supplementary material for: Visual intelligent loop-mediated isothermal amplification based Magnetic bead for rapid detection of Burkholderia gladioli pv.cocovenenans
Source: Research Square preprint supplement (doi:10.21203/rs.3.rs-6522045/v1), 2025-05-15
Supplement: Supplementary file 1 [file b793ee9f1414301a9568f09d.docx]

# **Visual intelligent loop-mediated isothermal amplification-based magnetic beads for rapid detection of *Burkholderia gladioli pv.cocovenenans***

Lingyan Zhenga,b, Dongmei Lia,b, Yumin Shena,b, Jiali Wanga,b，Pengcheng Zhangb, Hong Duana,b, Ke Xiongb*, Joseph Irudayarajc

aKey Laboratory of Geriatric Nutrition and Health, Ministry of Education, Beijing Technology and Business University, Beijing 100048, China

bBeijing Laboratory for Food Quality and Safety, Beijing Technology & Business University (BTBU), Beijing, 100048, China

cDepartment of Bioengineering, University of Illinois at Urbana-Champaign, Urbana, IL 61801, USA

Corresponding author: Dr. Xiong Ke

Email: xiongke1129@163.com

**Supplementary data**

Data on primer screening, optimal primer binding sites, optimization of LAMP conditional optimization, and gel electrophoresis of PCR sensitivity to DNA


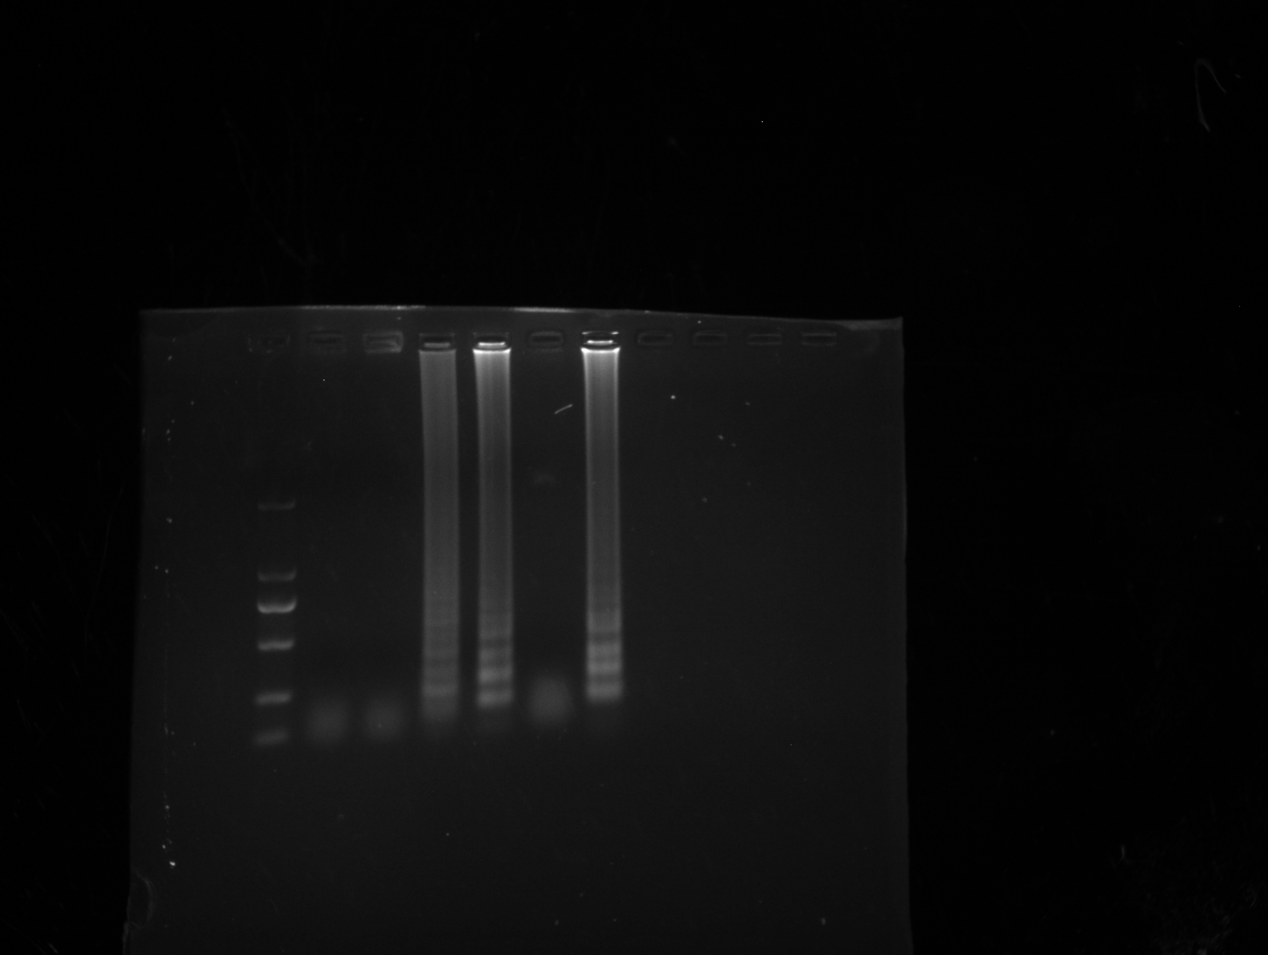


**Fig. S1.**Screening of three LAMP primers.


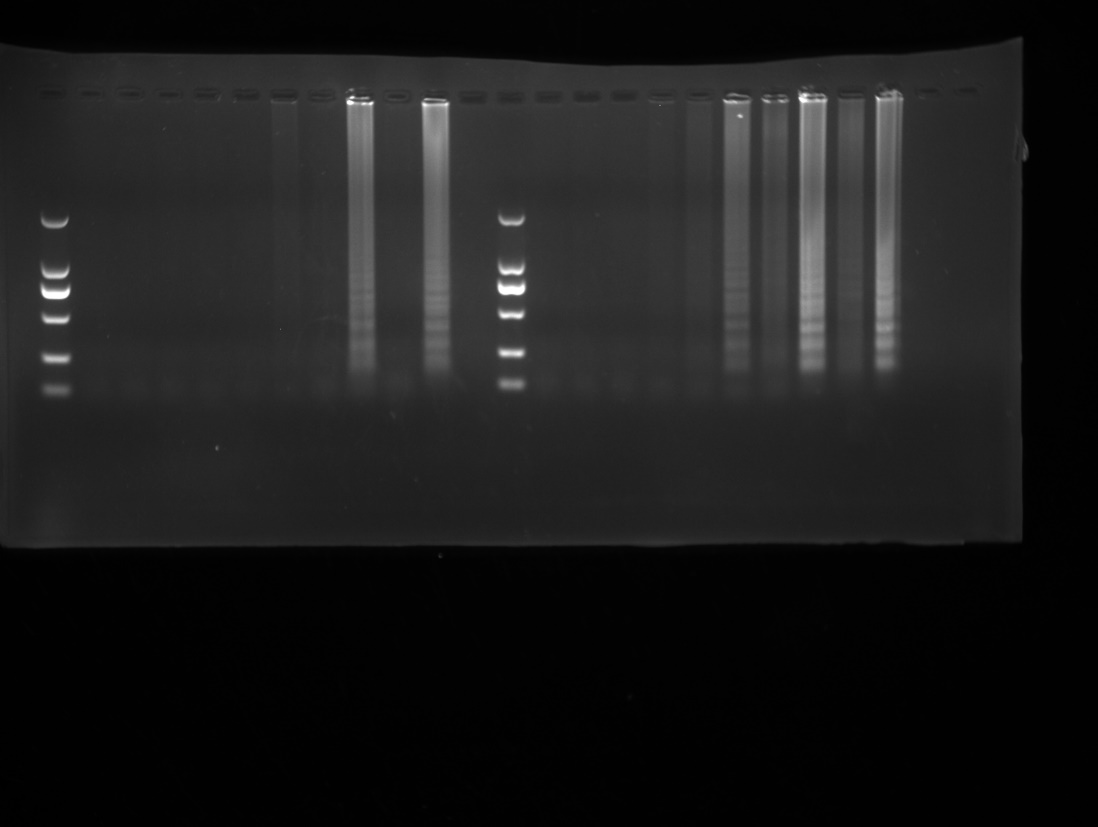


**Fig. S3.** LAMP reaction temperature and time optimization of gel electropherograms 63℃ and 67℃.


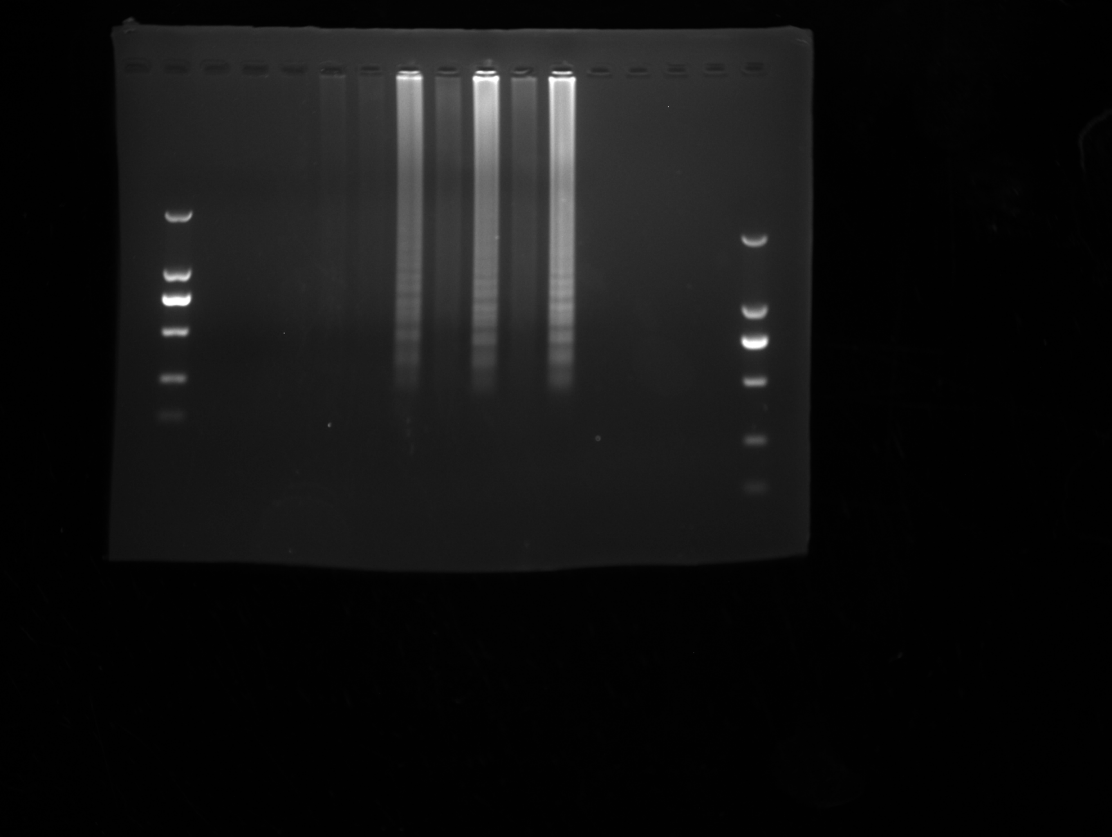


**Fig. S3.** LAMP reaction temperature and time optimization of gel electropherograms 64℃.


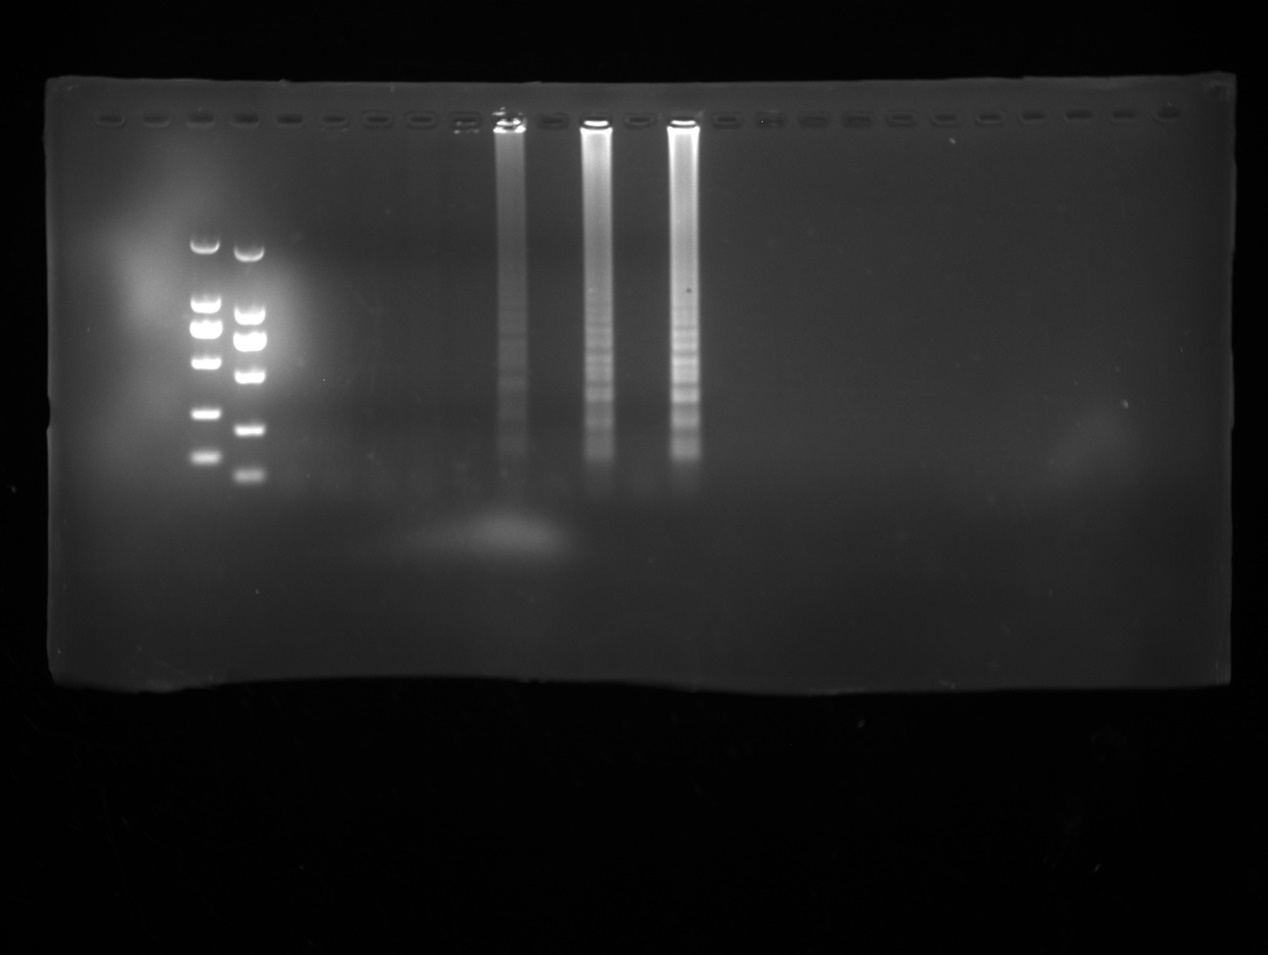


**Fig. S3.** LAMP reaction temperature and time optimization of gel electropherograms 65℃.


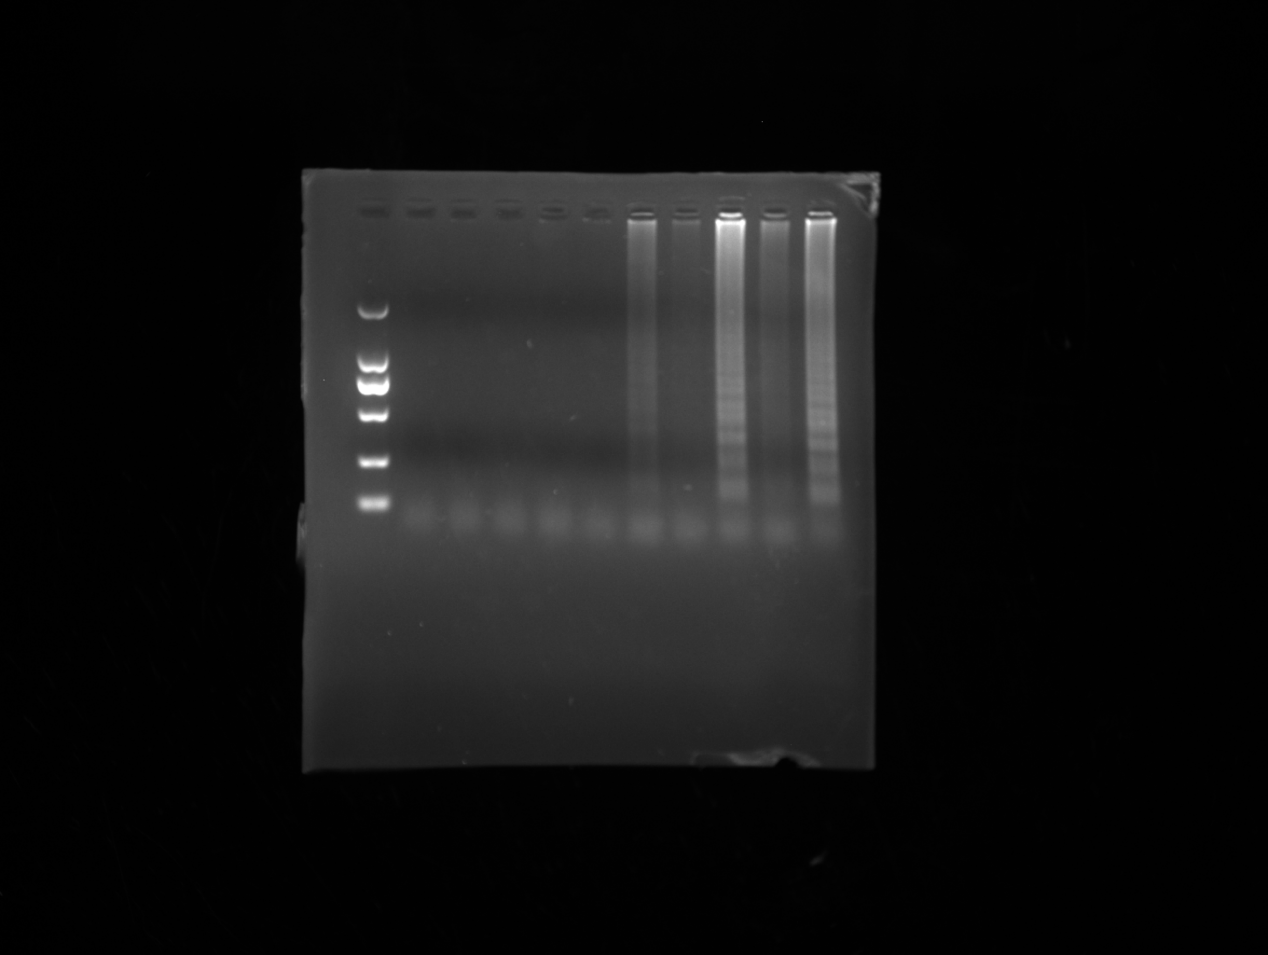


**Fig. S3.** LAMP reaction temperature and time optimization of gel electropherograms 66℃.


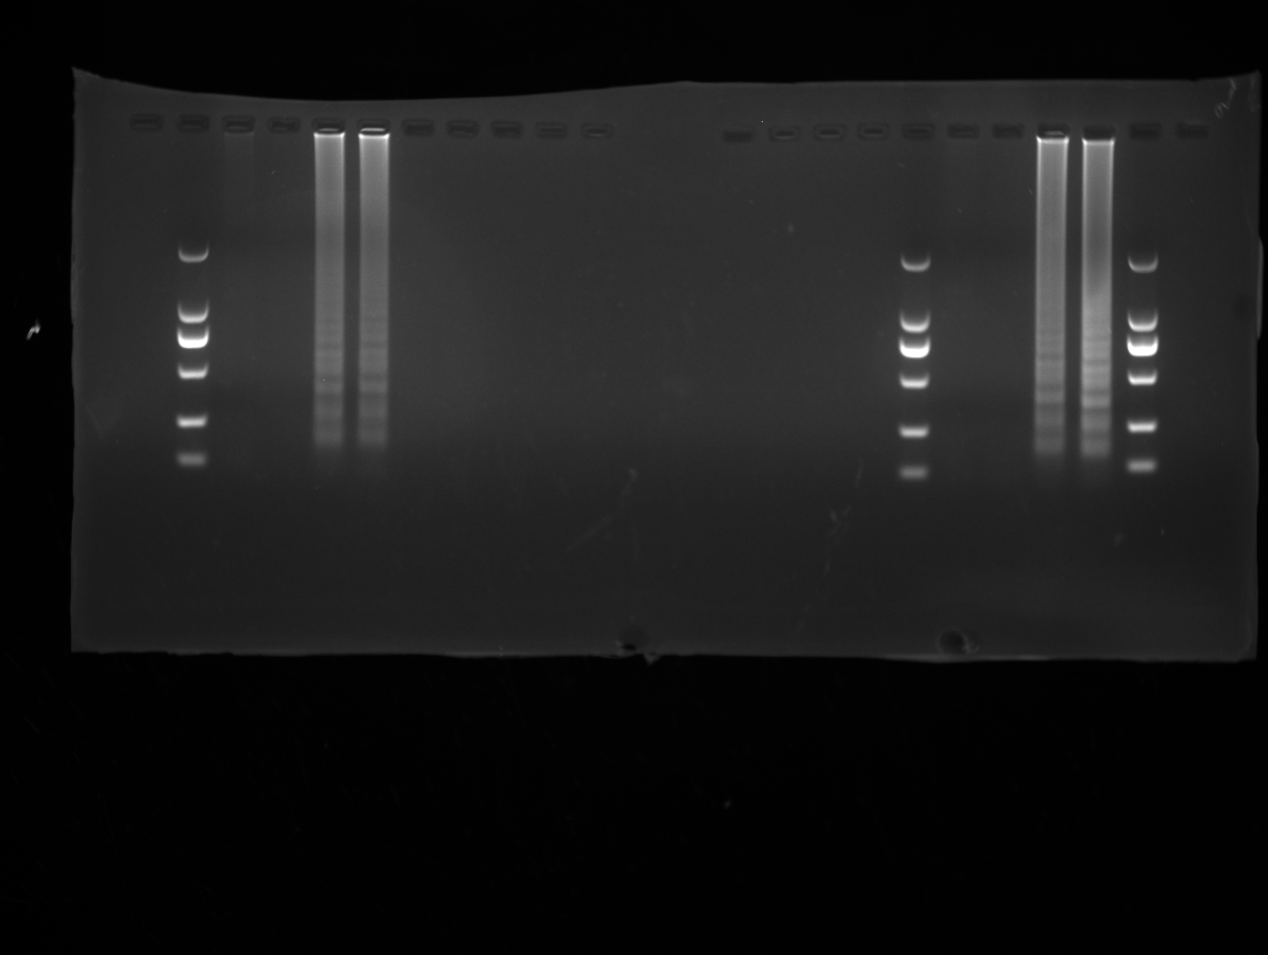


**Fig. S4.** LAMP reaction enzyme concentration 2U and 4U.


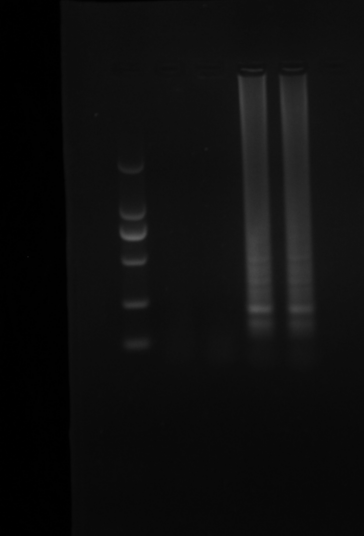


**Fig. S4.** LAMP reaction enzyme concentration 6U.


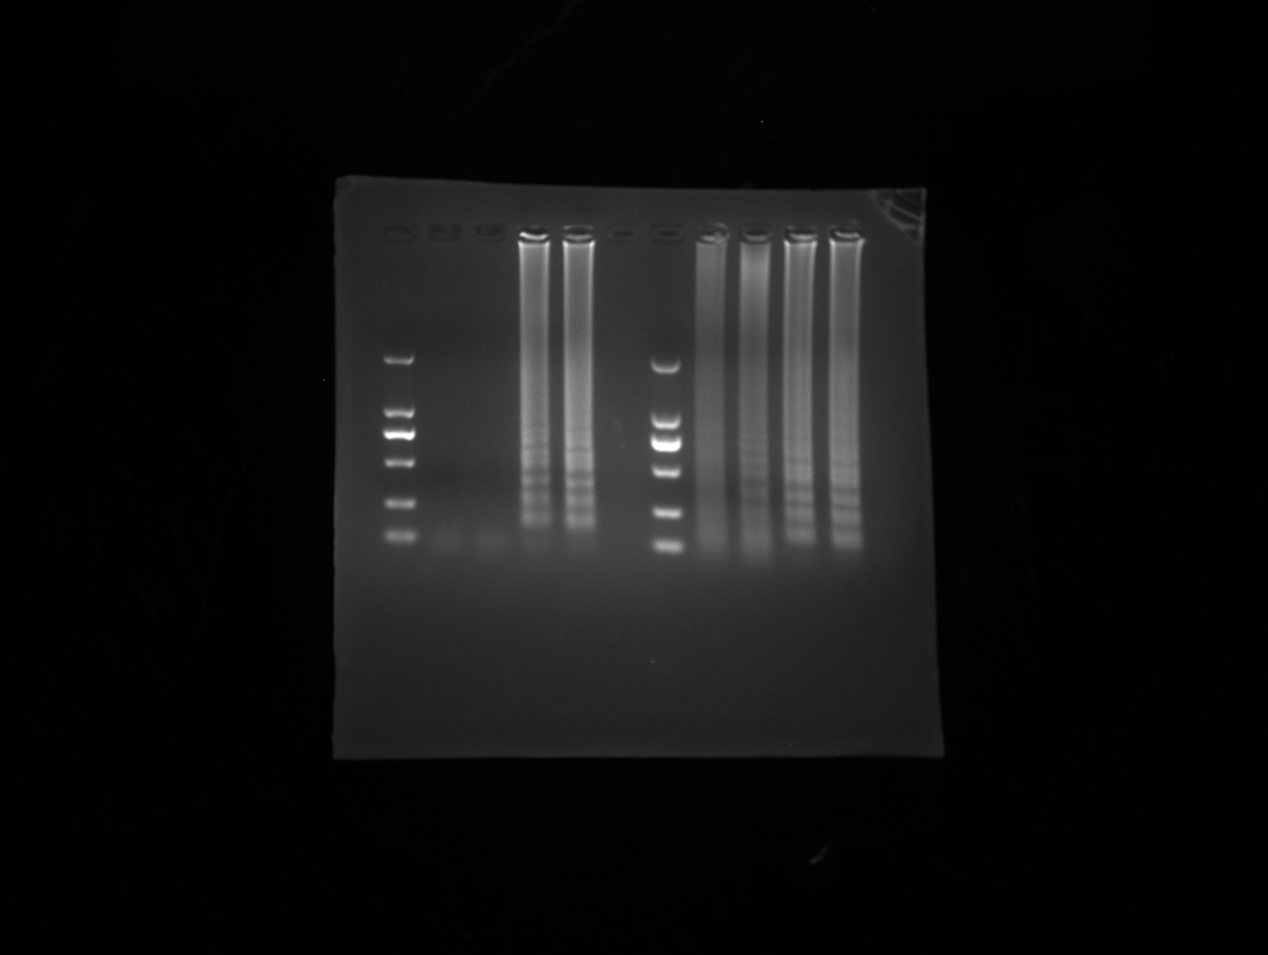


**Fig. S4.** LAMP reaction enzyme concentration 8U.


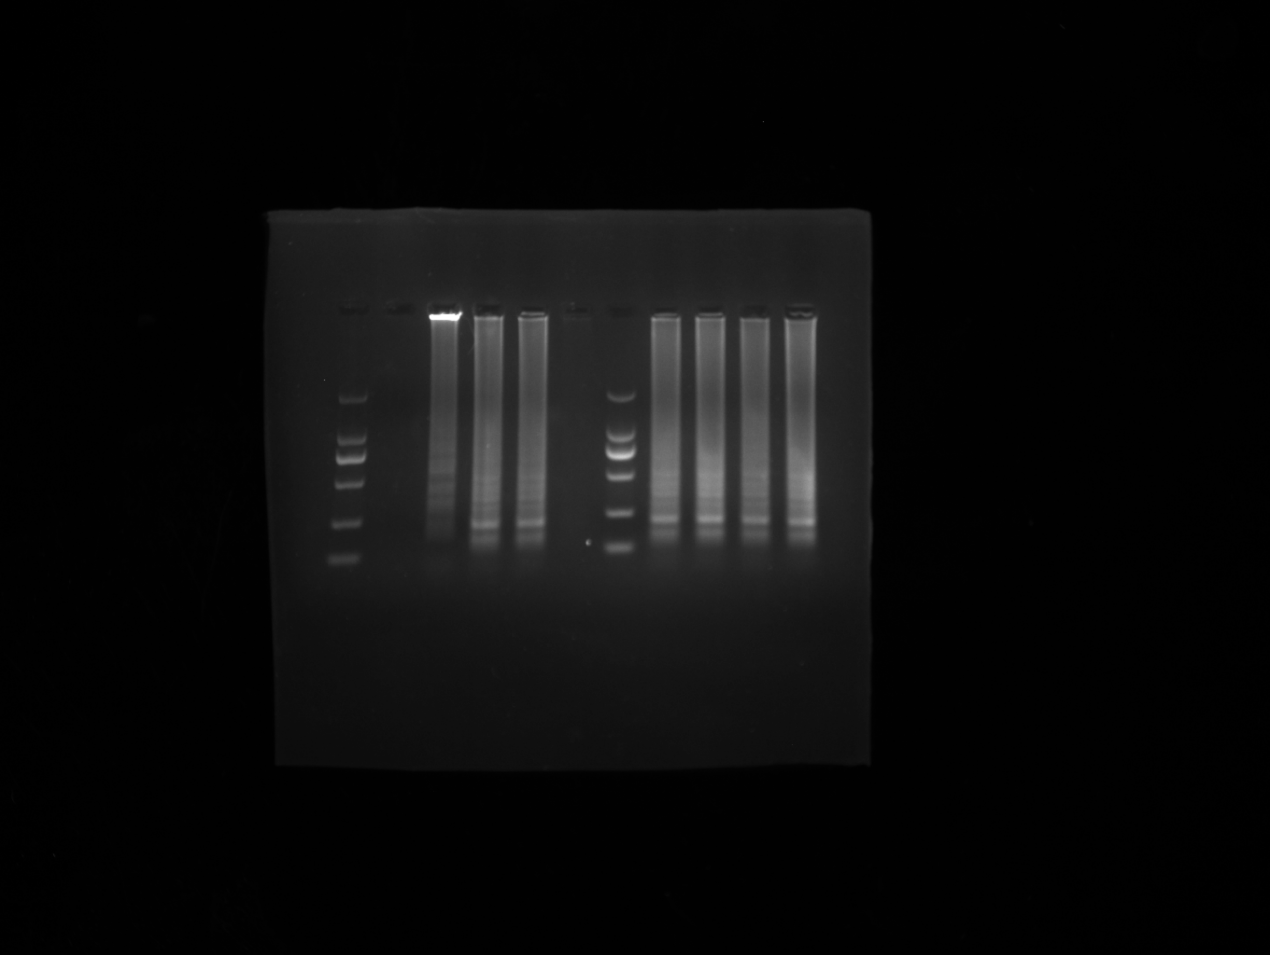


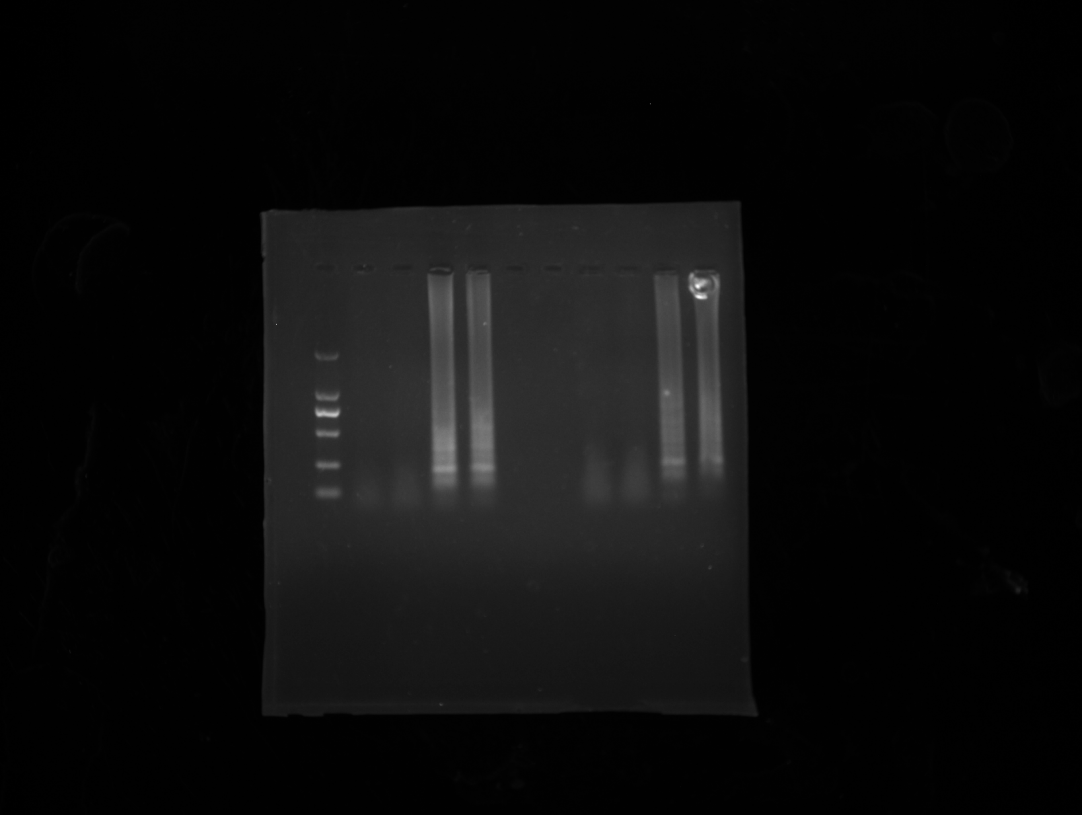
**Fig. S4.** LAMP reaction the ratio of the inner and outer primer concentration optimization 10:1:2.

**Fig. S4.** LAMP reaction the ratio of the inner and outer primer concentration optimization 8:1:2.

**
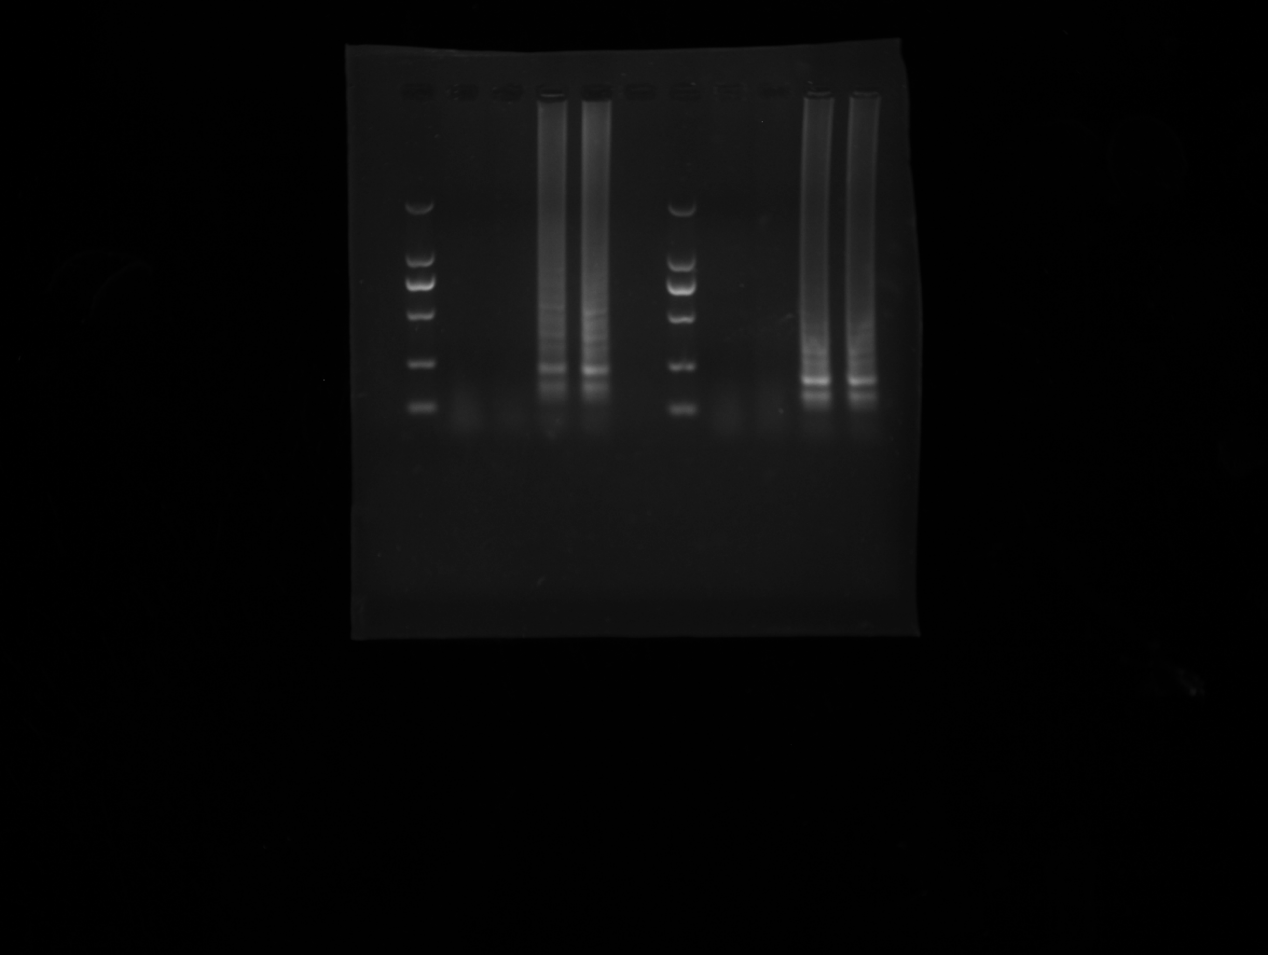
**

**Fig. S4.** LAMP reaction the ratio of the inner and outer primer concentration optimization 4:1:2 and 6:1:2.


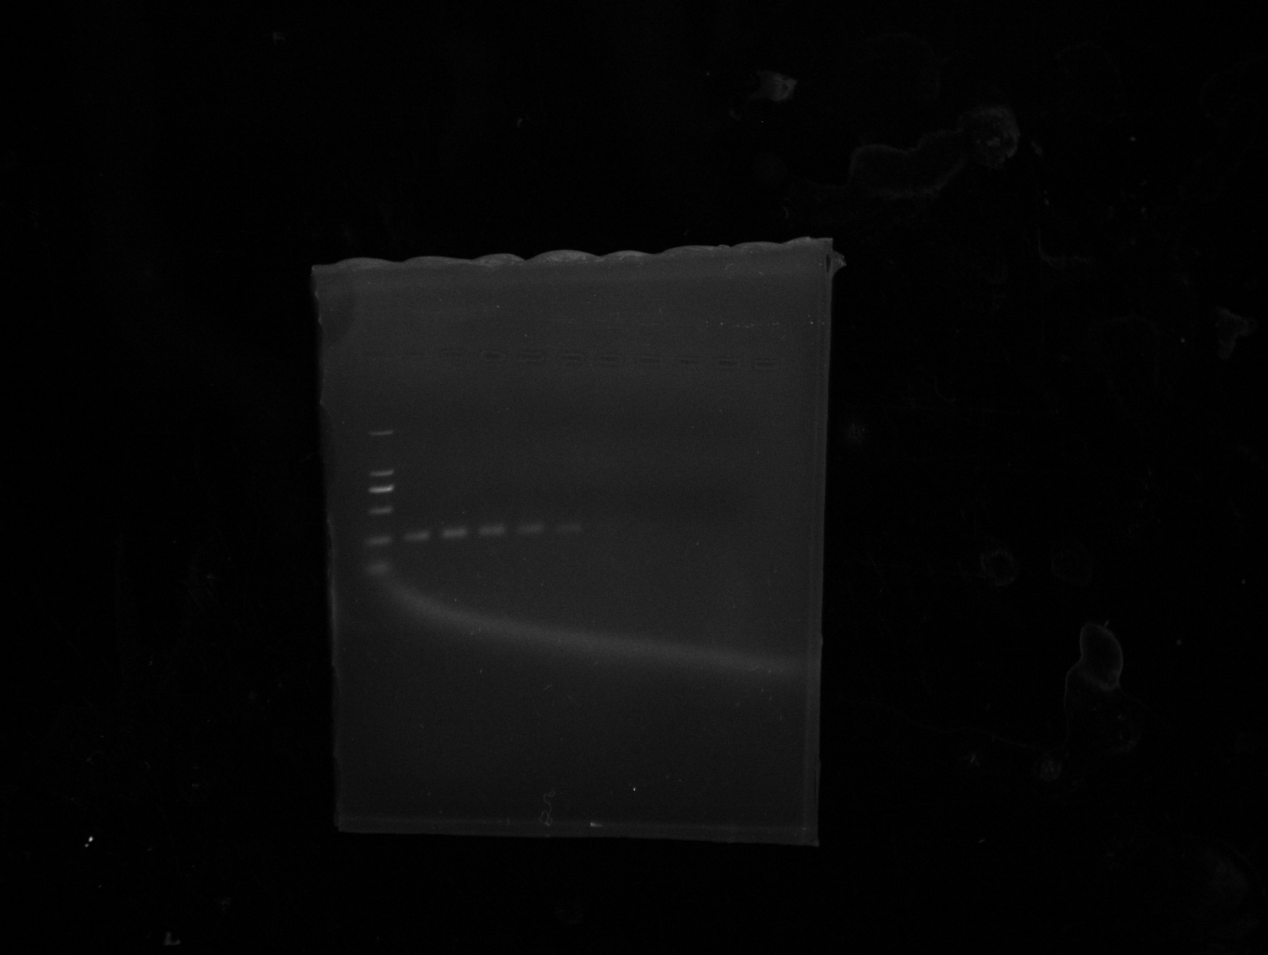


**Fig. S5.** Gel electrophoresis for PCR product. Lane M: 2000 bp DNA Maker. Lane 1-10: 250 ng/μL,25 ng/μL,2.5 ng/μL,250 pg/μL,25 pg/μL,2.5 pg/μL,250 fg/μL,25 fg/μL,2.5 fg/μL,ddH2O.
